# Supplementary material
Source: PubMed Central journal article supplement (PMC10777207)
Supplement: NIHMS1949678-supplement-Supplementary_materials.pdf [file NIHMS1949678-supplement-Supplementary_materials.pdf]

Supplementary Materials for  
**Exportin 1 inhibition prevents neuroendocrine transformation through SOX2  
down-regulation in lung and prostate cancers**

Alvaro Quintanal-Villalonga *et al.*

Corresponding author: Email: Alvaro Quintanal-Villalonga, [quintaal@mskcc.org](mailto:quintaal@mskcc.org); Charles M. Rudin,  
[rudinc@mskcc.org](mailto:rudinc@mskcc.org)

*Sci. Transl. Med.* **15**, eadf7006 (2023)  
DOI: 10.1126/scitranslmed.adf7006

**The PDF file includes:**

Figs. S1 to S3

**Other Supplementary Material for this manuscript includes the following:**

Data file S1  
MDAR Reproducibility checklist

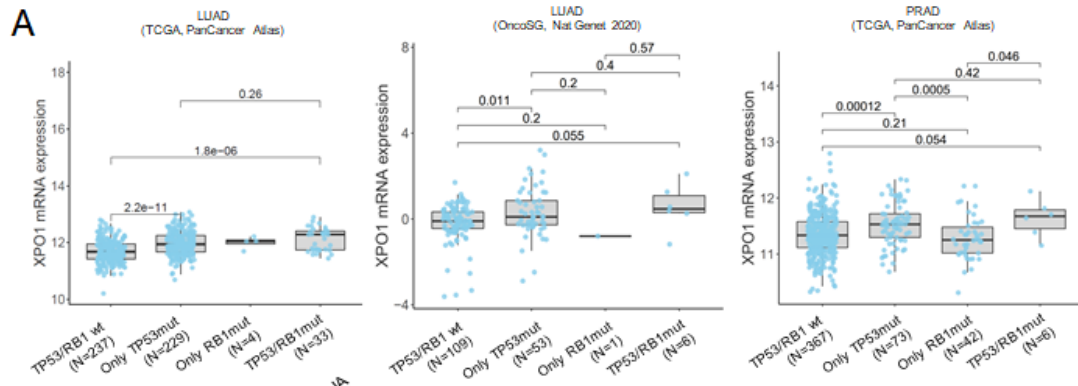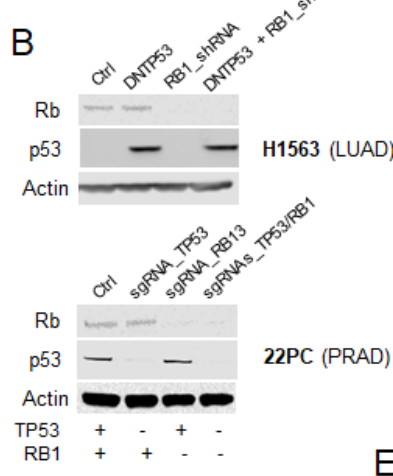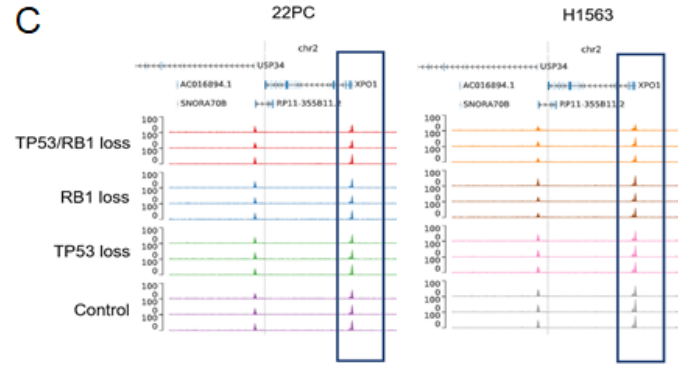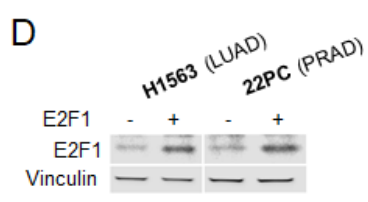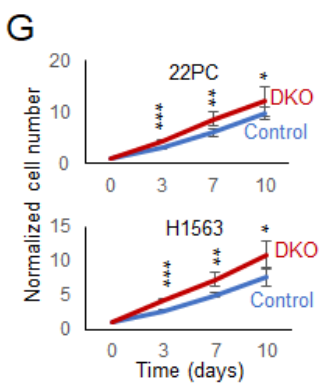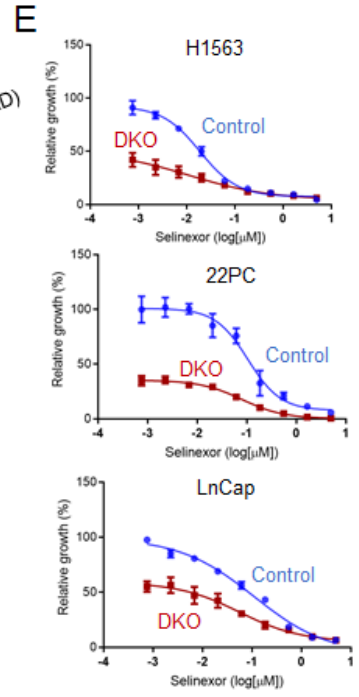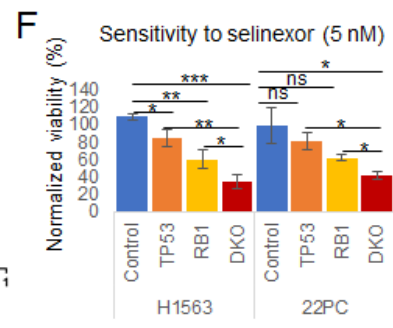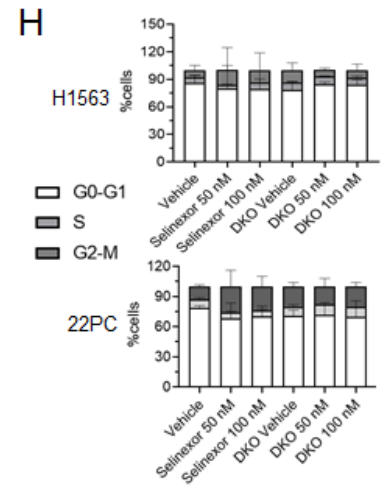

**Supplementary Figure S1.** (A) *XPO1* mRNA expression in adenocarcinoma clinical specimens, categorized by *TP53/RB1* status. Data obtained from LUAD TCGA (PanCancer, n=237 wild type (wt), 33 mutated), LUAD OncoSG (OncoSG, Nat Genetics 2020, n=109 wt, 6 mutated) and PRAD TCGA (PanCancer, n=367 wt, 6 mutated)(1, 2). (B) Western blots showing TP53 and RB1 expression in our isogenic cell line models with or without induced loss of function of *TP53* and/or *RB1* by shRNA against RB1 and dominant negative TP53 gene overexpression (H1563) or CRISPR/Cas9 knock out (22PC). (C) DNA accessibility ATACseq data from isogenic control and *TP53/RB1*-inactivated H1563 and 22PC isogenic cell lines. The transcription start site for the *XPO1* gene is highlighted. (D) Western blot showing E2F1 protein expression in isogenic adenocarcinoma cell lines with ectopic E2F1 overexpression. (E) Dose-response curves for cytotoxic assays of control and *TP53/RB1*-inactivated (“DKO”) cell lines with selinexor. (F) Plot showing a representative biological replicate of an experiment assessing viability of control and *TP53*- and/or *RB1*-inactivated H1563 and 22PC cells treated with 5 nM selinexor. (G) Plots showing proliferation of control and *TP53/RB1*-inactivated H1563 and 22PC isogenic cell lines (H) Barplots showing cell cycle analyses on control and *TP53/RB1*-inactivated (“DKO”) cell lines, with or without selinexor 4-day treatment at the concentrations stated. p-values were calculated using the Student’s t-test (unpaired, heterogeneous variances, two-tailed). p-value legend: \*<0.05, \*\*<0.01, \*\*\*<0.001.

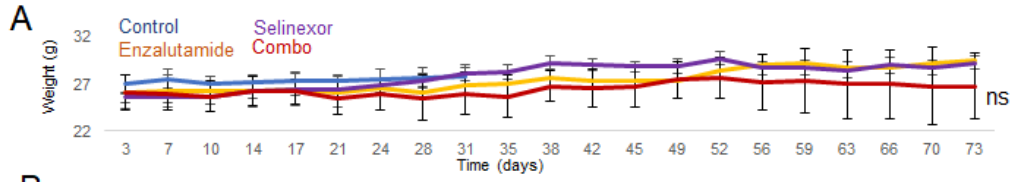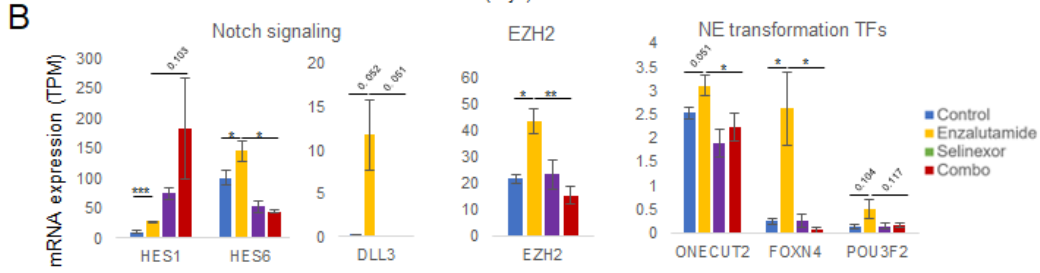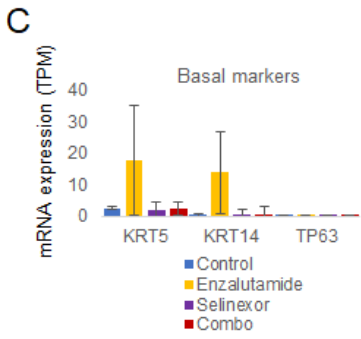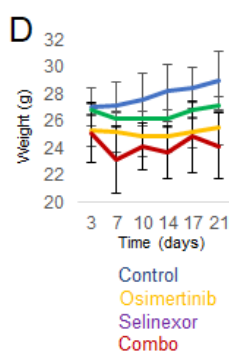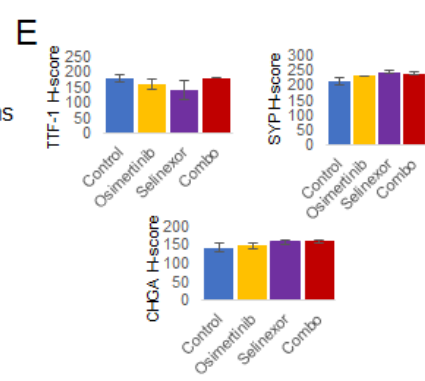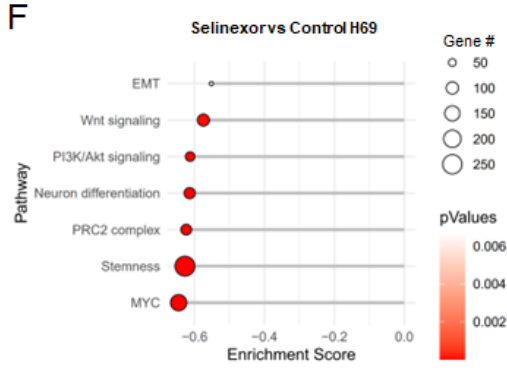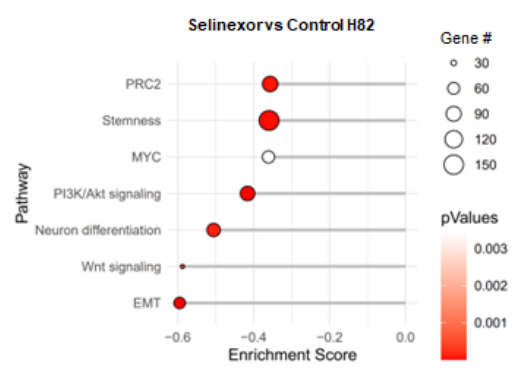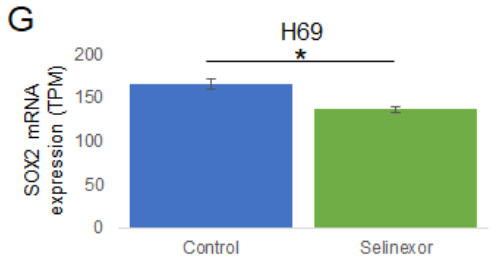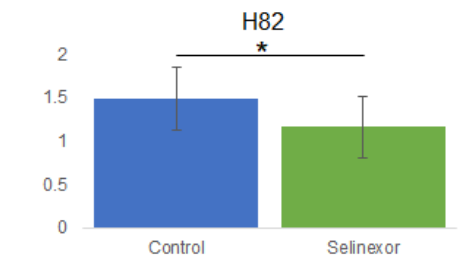

**Supplementary Figure S2.** (A) Body weight for mice treated with enzalutamide, selinexor or their combination in experiment shown in Figure 4A. RNA sequencing data from tumors from Figure 4A collected at control arm experimental endpoint (day 31), showing mRNA expression levels for genes of interest, involved in NE transformation (B) or basal markers (C), divided by treatment arm (n=4, 3, 3 and 3 tumors for the control, enzalutamide-, selinexor- and combo-treated tumors). In vivo treatment of cell line xenografts for *TP53/RB1* DKO 22PC PRAD cells was performed with enzalutamide, selinexor or their combination. 5-10 female athymic nude mice were subcutaneously engrafted per treatment arm and until tumors reached 100-150 mm<sup>3</sup>. At that point, mice were randomized into groups and treated with either vehicle (n=7 for 22PC and n=4 for LnCap/AR), selinexor (10 mg/kg p.o. QDx3, n=7 for 22PC and n=4 for LnCap/AR), enzalutamide (10 mg/kg p.o. QDx5, n=7 for 22PC and n=5 for LnCap/AR), or the combinations of enzalutamide + selinexor at the previously mentioned doses (n=9 for 22PC and n=5 for LnCap/AR). Mice weights and tumor volumes were measured twice a week and mice were sacrificed when tumors reached humane endpoint (volume = 1000 mm<sup>3</sup>). (D) Body weight for mice treated with osimertinib, selinexor or their combination in experiment shown in Figure 4I. (E) H-scores for IHC assessment of TTF-1, SYP and CHGA in MSK\_Lx\_151 tumors from Figure 4I. (F) Pathway enrichment analysis on DEGs from selinexor-treated versus control untreated *de novo* SCLC cell lines H69 and H82. Data was obtained from Quintanal-Villalonga et al., 2022(3). (G) SOX2 mRNA expression on control and selinexor-treated *de novo* SCLC cell lines H69 and H82. Data for (F) and (G) was obtained from (3). p-values were calculated using the Student's t-test (unpaired, heterogeneous variances, two-tailed). p-value legend: \*<0.05, \*\*<0.01, \*\*\*<0.001.

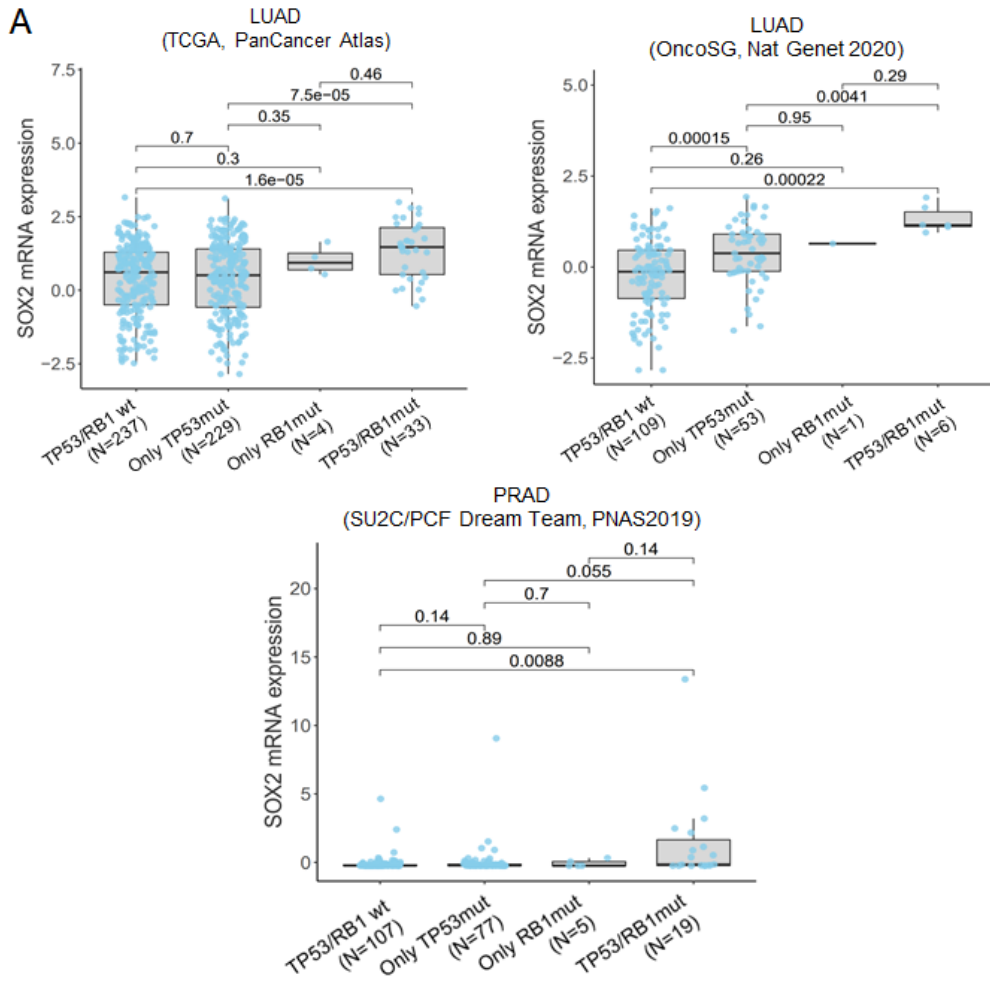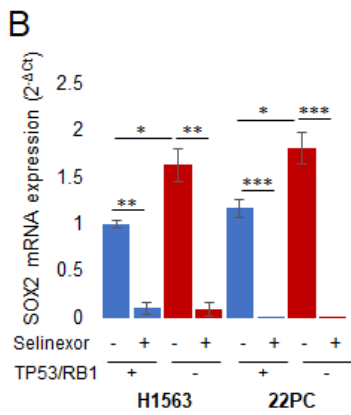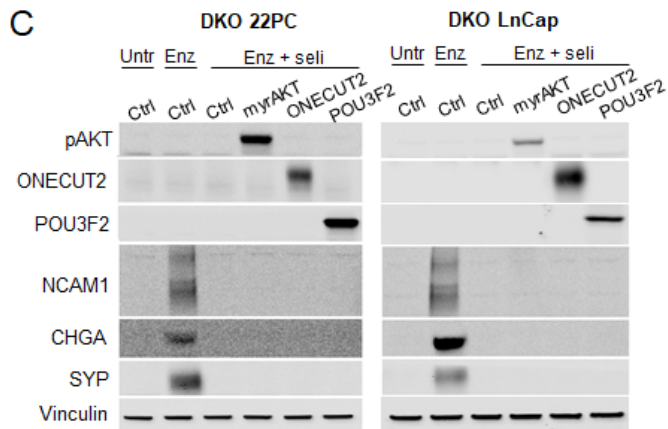

**Supplementary Figure S3.** (A) *SOX2* mRNA expression in adenocarcinoma clinical specimens, categorized by *TP53/RB1* status. Data obtained from LUAD TCGA (PanCancer, n=237 wt and 33 mutated), LUAD OncoSG (OncoSG, Nat Genetics 2020, n=109 wt and mutated) and PRAD TCGA (PanCancer, n=107 wt and 19 mutated)(1, 2). (B) Barplot showing mRNA expression levels of *SOX2* mRNA expression in control and *TP53/RB1*-inactivated isogenic H1563 (LUAD) and 22PC (PRAD) cell lines treated with selinexor (5 nM, 4 days). (C) Western blot assessment of NE markers in DKO 22PC and LnCap cell lines treated with enzalutamide or enzalutamide + selinexor, including control, myrAKT-, ONECUT2- and POU3F3-overexpressing cell lines. p-values were calculated using the Student's t-test (unpaired, heterogeneous variances, two-tailed). p-value legend: \*<0.05, \*\*<0.01, \*\*\*<0.001.

**Tumor level**

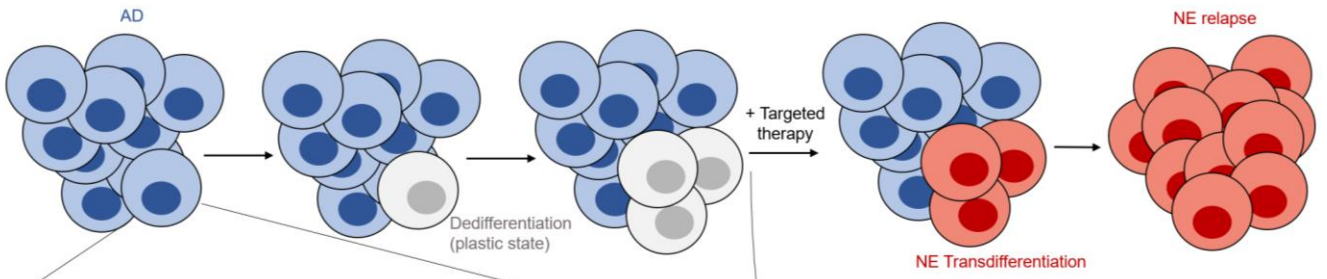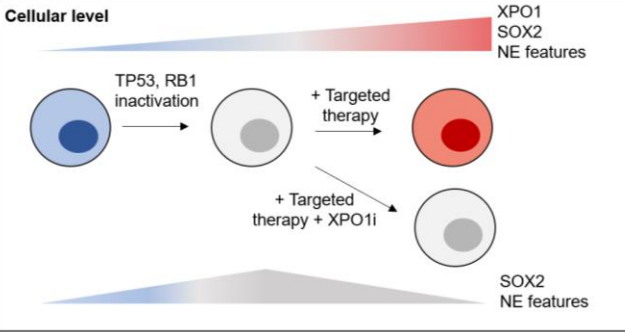

+ Targeted therapy + XPO1i

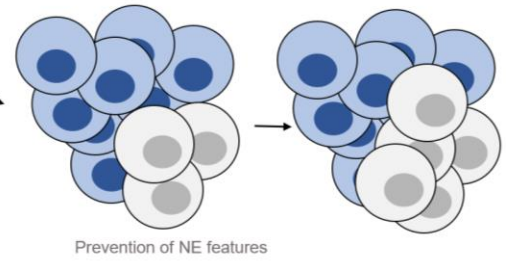



**Supplementary Figure S4.** Model of XPO1-dependent NE transformation. Loss of *TP53* and *RBI* function may induce a dedifferentiated, plastic state characterized by concomitant *XPO1* and *XPO1*-dependent *SOX2* upregulation, with higher potential for NE transdifferentiation, particularly under the action of targeted therapy. Combination of XPO1 inhibitors with targeted therapy downregulates *SOX2* expression, required for NE transdifferentiation, thus interfering with NE relapse and potentially leading to mechanisms of resistances to targeted therapy alternative to NE transformation.
